# Supplementary material for: A hybridized graphene carrier highway for enhanced thermoelectric power generation
Source: Royal Society of Chemistry journal article supplement (doi:10.1039/c2cp42936e), 2012-01-01
Supplement: c2cp42936e.pdf [file c2cp42936e.pdf]

## Supplementary Information

### A hybridized graphene carrier highway for enhanced thermoelectric power generation

Seunghyun Hong,<sup>a,b</sup> Eun Sung Kim,<sup>b,c</sup> Wonyoung Kim,<sup>b,c</sup> Seong-Jae Jeon,<sup>d,e</sup> Seong Chu Lim,<sup>c</sup> Ki Hong Kim,<sup>f</sup> Hoo-Jeong Lee,<sup>d</sup> Seungmin Hyun,<sup>e</sup> Duckjong Kim,<sup>e</sup> Jae-Young Choi,<sup>b,g</sup> Young Hee Lee,<sup>b,c,h</sup> and Seunghyun Baik<sup>b,c,i\*</sup>

<sup>a</sup> SKKU Advanced Institute of Nanotechnology, Sungkyunkwan University, Suwon, Korea.

<sup>b</sup> Samsung-SKKU Graphene Center (SSGC), Sungkyunkwan University, Suwon, Korea.

<sup>c</sup> Department of Energy Science, Sungkyunkwan University, Suwon, Korea.

<sup>d</sup> School of Advanced Materials, Sungkyunkwan University, Suwon, Korea.

<sup>e</sup> Department of Nano-mechanics, Korea Institute of Machinery and Materials, Daejeon, Korea.

<sup>f</sup> AE center, Samsung Advanced Institute of Technology, Korea.

<sup>g</sup> Graphene center, Samsung Advanced Institute of Technology, Korea.

<sup>h</sup> Department of Physics and BK21 Physics Division, Sungkyunkwan University, Suwon, Korea.

<sup>i</sup> School of Mechanical Engineering, Sungkyunkwan University, Suwon, Korea.

\* To whom correspondence should be addressed. E-mail: [sbaik@me.skku.ac.kr](mailto:sbaik@me.skku.ac.kr)

Thermoelectric property measurements

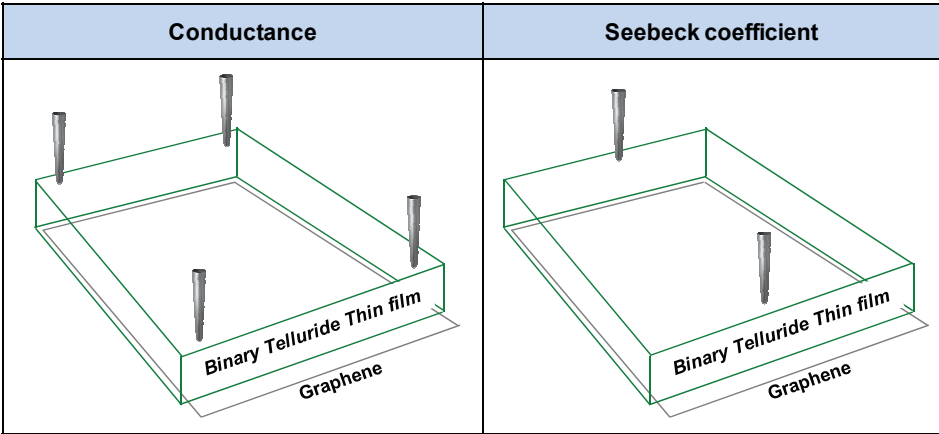

Figure S1| Probe configurations for thermoelectric property measurements

A narrow band-gap semiconducting thin film, Bi<sub>2</sub>Te<sub>3</sub> or Sb<sub>2</sub>Te<sub>3</sub>, was formed on monolayer graphene as shown in Fig. S1. The areas of graphene and binary telluride film were 1×1 and 1.1×0.9 cm<sup>2</sup>, respectively. The width of the binary telluride film was slightly larger than graphene to ensure the complete coverage. The binary telluride film was offset by 0.2 cm to measure the contact resistance between 2 layers as will be discussed in Fig. S7. The monolayer graphene (1×1 cm<sup>2</sup>) and the pure binary telluride film (1.1×1.1 cm<sup>2</sup>) were also synthesized. A schematic of synthesized specimens and acronyms are provided in Table S1.

| Sample configuration | Substrate           | Layer 1                         | Layer 2                         | Layer 3 | Notation                                 |
|----------------------|---------------------|---------------------------------|---------------------------------|---------|------------------------------------------|
|                      | Si/SiO <sub>2</sub> | Bi <sub>2</sub> Te <sub>3</sub> | -                               | -       | Bi <sub>2</sub> Te <sub>3</sub> 10nm     |
|                      |                     | Sb <sub>2</sub> Te <sub>3</sub> | -                               | -       | Sb <sub>2</sub> Te <sub>3</sub> 10nm     |
|                      |                     | Monolayer Graphene              | -                               | -       | Sb <sub>2</sub> Te <sub>3</sub> 20nm     |
|                      |                     | Monolayer Graphene              | -                               | -       | Graphene                                 |
|                      |                     | Monolayer Graphene              | Bi <sub>2</sub> Te <sub>3</sub> | -       | GRP/Bi <sub>2</sub> Te <sub>3</sub> 10nm |
|                      |                     | Monolayer Graphene              | Sb <sub>2</sub> Te <sub>3</sub> | -       | GRP/Sb <sub>2</sub> Te <sub>3</sub> 10nm |
|                      |                     |                                 |                                 |         | GRP/Sb <sub>2</sub> Te <sub>3</sub> 20nm |

Table S1| Acronyms of synthesized specimens are provided with a schematic diagram. The thickness of the binary telluride layer is shown in the acronym, but the basic Si/SiO<sub>2</sub> substrate is not included for reasons of simplicity.

It is difficult to measure thermoelectric properties of thin films precisely (S1). Four Au-coated oxygen-free bronze probes with a diameter of ~450 μm were used for the measurements of conductance (*S*) and sheet carrier concentration at room temperature with a Hall effect measurement system (Ecopia, HMS-5000 & AMP-55) based on the van der Pauw method (S2-3). The following equation was used to calculate  $\sigma$ .

$$\sigma = \frac{l}{w \cdot t} S \text{ Eq. (S1)}$$

where *l*, *w* and *t* are the length, width and thickness of the specimen. The probe position near the edge of specimen was adjusted to have the same probe distance in the length and width direction (Fig. S1), and  $\sigma$  was assumed to be a function of *t* only. The interlayer spacing in graphite, 0.335 nm, was used as the thickness of graphene (S4). A total thickness of 10.335 nm was used to calculate  $\sigma$  of GRP/Sb<sub>2</sub>Te<sub>3</sub> 10 nm.

The Seebeck coefficient was measured using a Fraunhofer IPM thermoelectric measurement setup equipped with two probes. A schematic diagram of the device is shown in Fig. S2a (S5). Two Peltier-elements with temperature controllers (Thorlabs TED 350) were used to control the stage temperatures. The temperature

difference on the sample was in a range between 0.4 and 1 K which was measured using type T thermocouples (TC, Omega, diameter  $\sim 250\ \mu\text{m}$ ). The copper wires of the thermocouples were used to measure thermoelectric voltage (S5). The thermoelectric data were measured by a multimeter (Keithley 2700) equipped with a multiplexer (Keithley 7700). Five temperature data were recorded in 20 sec and an average value was used to calculate a Seebeck coefficient. The maximum limit of error of the type T thermocouple (Omega) is 1 K for the measurement of an absolute temperature. However, it provides a finer resolution for the measurement of temperature difference. As shown in Fig. S2b, the temperature difference measured by thermocouples was compared with that measured using resistance temperature detectors (RTD, MIRAE TECH) connected with a data acquisition unit (Agilent 34970A). The maximum limit of error of the resistance temperature detectors is  $\sim 0.15\ \text{K}$  at the measurement temperature of 303 K. The error between two measurements slightly increased with increasing temperature difference, and the maximum error was  $\sim 0.2\ \text{K}$  in the investigated temperature difference range. The measurement of Seebeck coefficient was calibrated using a standard constantan specimen with a nominal Seebeck coefficient of  $-37\ \mu\text{V/K}$  at 300 K. There was a linear relation between the thermoelectric voltage and temperature difference. The difference of  $11.8\ \mu\text{V/K}$  between the slope of the data and the nominal value was subtracted as a baseline correction. Figure S2c shows the data of the standard specimen after the baseline subtraction. The thermoelectric voltage generated from leads and thermocouple inaccuracy may contribute to the baseline shift.

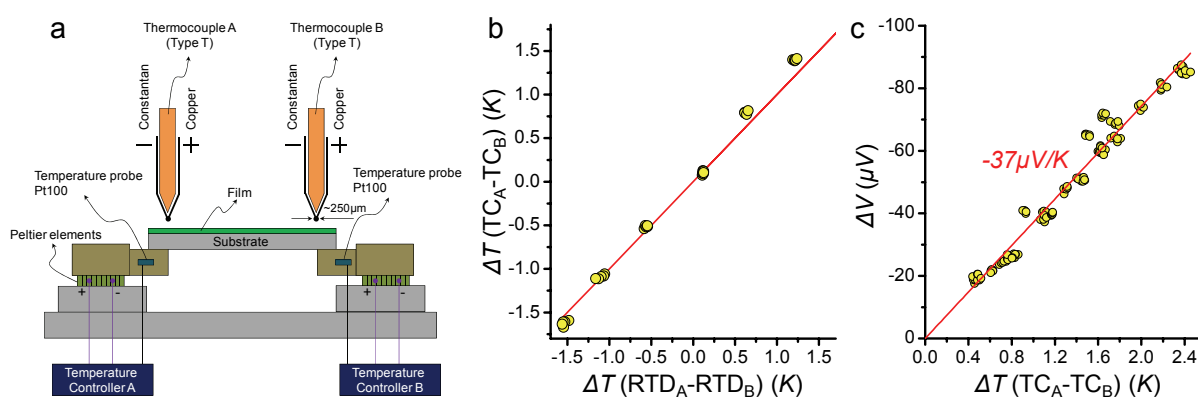

**Figure S2** | Fraunhofer IPM thermoelectric measurement setup for Seebeck coefficient (a) Schematic diagram (b) Comparison of temperature difference measured by thermocouples and resistance temperature detectors. The mean temperature of two Peltier elements was 303 K. (c) Calibration using a standard specimen (constantan,  $3 \times 3 \times 22\ \text{mm}^3$ ).

In order to improve reliability of measurement techniques, the Seebeck measurement was additionally carried out using an in-house-built device (Fig. S3a). Type T thermocouples (SENTECH, diameter  $\sim 280\ \mu\text{m}$ ), which were calibrated by Korea Laboratory Accreditation Scheme, were used to measure the temperature difference on the sample. The error was within 0.1 K for the absolute temperature measurements of 293 and 308 K (measurement uncertainty at 95 % confidence level = 0.3 K). The copper wires of the thermocouples were used to measure thermoelectric voltage. The temperature and voltage data were recorded using a data acquisition unit (Agilent 34970A) and a nano-voltmeter (Keithly 2182A), respectively. Five temperature data were recorded in 20 sec and an average value was used to calculate a Seebeck coefficient. Two Peltier elements connected with a 2-channel DC power supply (Agilent E3648A) generated a temperature difference of 0.4~1.4 K on the sample. The temperature difference measured by thermocouples was compared with that measured using the resistance temperature detectors (Fig. S3b). The maximum error was  $\sim 0.3\ \text{K}$ . The measurement of Seebeck coefficient was

calibrated using a standard constantan specimen (Fig. S3c). There was a linear relation between the thermoelectric voltage and temperature gradient, and the slope was  $-37 \mu\text{V/K}$  after the baseline subtraction of  $4.7 \mu\text{V/K}$ .

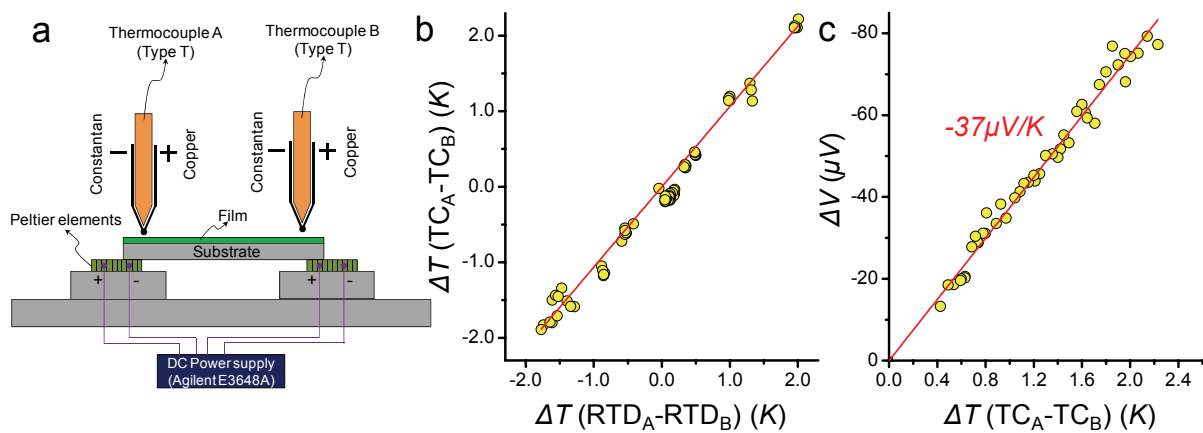

**Figure S3** In-house-built device for Seebeck measurement (a) Schematic diagram (b) Comparison of temperature difference measured by thermocouples and resistance temperature detectors. The mean temperature of two Peltier elements was 303 K. (c) Calibration using a standard specimen (constantan,  $3 \times 3 \times 22 \text{ mm}^3$ ).

As shown in Table S2, the experimentally obtained thermoelectric properties of GRP showed a good agreement with those of graphene in review papers demonstrating reliability of the measurement technique (S6-7). There was a large variation in thermoelectric properties of pure  $\text{Sb}_2\text{Te}_3$  specimens in literatures depending on the synthesis method. As shown in Table S3, the measured data of  $\text{Sb}_2\text{Te}_3$  10 nm fell within a similar range to those of high quality  $\text{Sb}_2\text{Te}_3$  films in literatures (S8). The thermoelectric properties of the specimens synthesized in this study will be discussed shortly.

| Specimen                    | Sheet resistance        | Seebeck coefficient    | Carrier mobility                    | Carrier concentration                 |
|-----------------------------|-------------------------|------------------------|-------------------------------------|---------------------------------------|
|                             | $\Omega/\square$        | $\mu\text{V/K}$        | $\text{cm}^2/\text{V}\cdot\text{s}$ | $\text{cm}^{-2}$                      |
| GRP (in this study)         | 1288.6                  | 63                     | 2340                                | $2.07 \times 10^{12}$                 |
| graphene <sup>(S6,S7)</sup> | 30-2000 <sup>(S6)</sup> | 50-100 <sup>(S7)</sup> | 700-3000 <sup>(S6)</sup>            | $10^{12}$ - $10^{13}$ <sup>(S6)</sup> |

**Table S2** Thermoelectric properties of graphene

| Specimen                                           | Electrical conductivity | Seebeck coefficient |
|----------------------------------------------------|-------------------------|---------------------|
|                                                    | $\text{S/cm}$           | $\mu\text{V/K}$     |
| $\text{Sb}_2\text{Te}_3$ 10nm (in this study)      | 439                     | 234                 |
| $\text{Sb}_2\text{Te}_3$ thin film <sup>(S8)</sup> | 793                     | 188                 |
|                                                    | 320                     | 191                 |

**Table S3** Thermoelectric properties of  $\text{Sb}_2\text{Te}_3$  films

## Synthesis and transfer process of monolayer graphene

Monolayer graphene was synthesized on a copper foil (purity ~99.9 %, thickness ~75  $\mu\text{m}$ ) by atmospheric pressure chemical vapor deposition (S9). Firstly, the temperature of the reactor was ramped to 1060 °C in 40 min and stayed constant for 30 min while supplying Ar (1000 sccm) and H<sub>2</sub> (200 sccm) gases. The gas flow was then switched to CH<sub>4</sub> (5 sccm)/H<sub>2</sub> (10 sccm)/Ar (1000 sccm) for 2 min for the growth of monolayer graphene. Finally, the reactor was cooled down to room temperature while maintaining Ar flow (1000 sccm) for 40 min. For the transfer process, PMMA (MicroChem, e-beam resist, 950 k C4) was spin-coated (1000 rpm, 60 sec) on top of the synthesized graphene and the copper layer was etched away (Transene, CE-100). After rinsing by deionized water, the PMMA/graphene layer was transferred onto a Si/SiO<sub>2</sub> (500  $\mu\text{m}$ /300 nm) substrate followed by the PMMA removal using acetone. For the transmittance characterization (Varian Inc., Cary 5000), the graphene was transferred onto a PET substrate (S10).

## Sputter deposition of binary telluride films

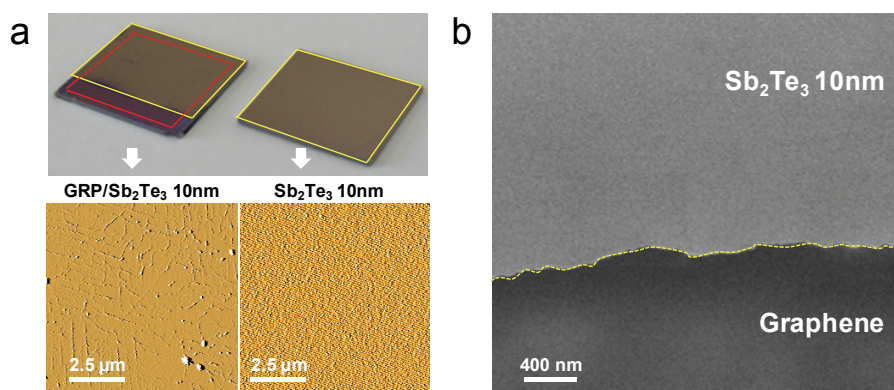

**Figure S4** Images of sputtered Sb<sub>2</sub>Te<sub>3</sub> films on the transferred monolayer graphene and bare Si/SiO<sub>2</sub> substrates (a) Optical and AFM (Veeco, 840-012-711) images. Wrinkles were observed for GRP/Sb<sub>2</sub>Te<sub>3</sub> 10 nm which were typically formed during the transfer process (S11) (b) SEM image of the step-region of GRP/Sb<sub>2</sub>Te<sub>3</sub> 10 nm (Jeol, JSM-7600F).

Thin binary telluride films (10~20 nm) were formed on the transferred graphene on Si/SiO<sub>2</sub> substrates or bare Si/SiO<sub>2</sub> substrates (control) by a magnetron sputtering method at an elevated substrate temperature of 473 K (S3, S12-13). Hot-pressed Bi (99.99 %) and Te (99.99 %) targets were co-sputtered to synthesize Bi<sub>2</sub>Te<sub>3</sub> films using RF powers of 24 W and 40 W, respectively, in Ar plasma environment. For Sb<sub>2</sub>Te<sub>3</sub> films, an Sb<sub>2</sub>Te<sub>3</sub> alloy target was sputtered at an RF power of 30 W. The working pressure in the chamber was  $3 \times 10^{-3}$  Torr. Figure S4 shows the images of sputtered Sb<sub>2</sub>Te<sub>3</sub> films on the transferred monolayer graphene and bare Si/SiO<sub>2</sub> substrates. The thickness of Sb<sub>2</sub>Te<sub>3</sub> film was 10 nm.

## The effect of $\text{Sb}_2\text{Te}_3$ film thickness on crystallinity

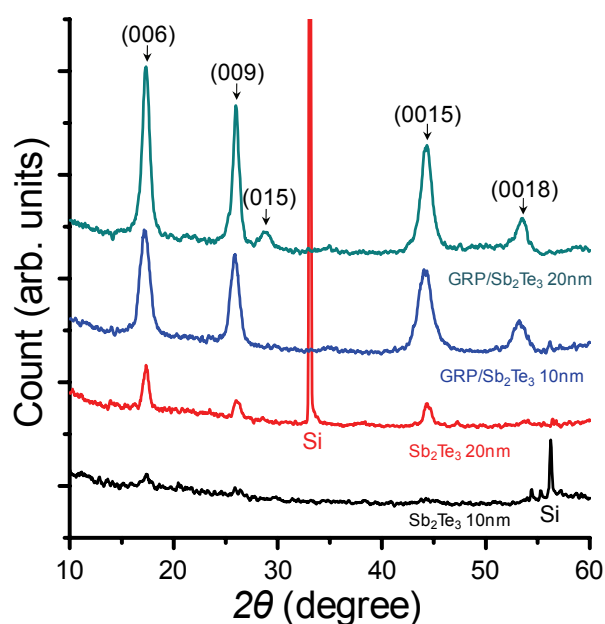

**Figure S5** XRD data ( $\theta$  -  $2\theta$  scan) showing the effect of  $\text{Sb}_2\text{Te}_3$  film thickness on crystallinity

The  $\text{Sb}_2\text{Te}_3$  films were formed on the transferred graphene and bare Si/SiO<sub>2</sub> substrates by the sputtering process. All the substrates were heated at 473 K during the sputtering process. The data of  $\text{Sb}_2\text{Te}_3$  10 nm and GRP/ $\text{Sb}_2\text{Te}_3$  10 nm were reproduced from Fig. 1d for comparison. For the  $\text{Sb}_2\text{Te}_3$  films sputtered on the bare Si/SiO<sub>2</sub> substrates, silicon peaks at 33° and 56° were significantly greater than  $\text{Sb}_2\text{Te}_3$  peaks.

The Seebeck coefficients of GRP/Sb<sub>2</sub>Te<sub>3</sub> 10nm

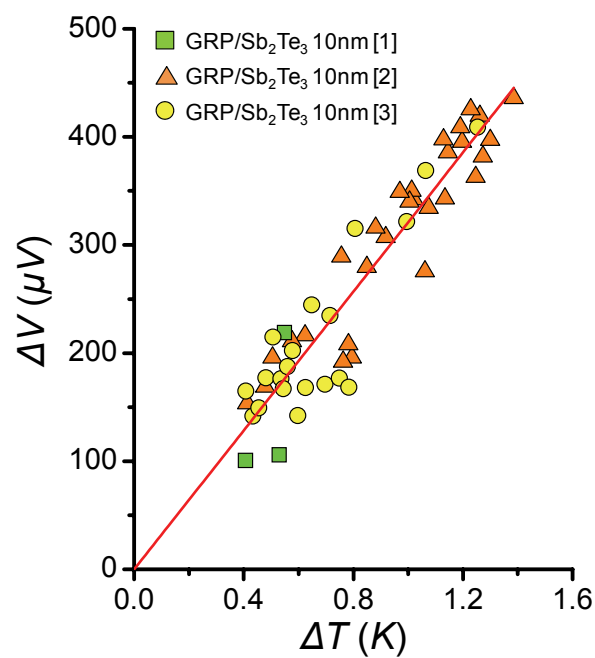

**Figure S6|** The thermoelectric voltage and temperature difference of GRP/Sb<sub>2</sub>Te<sub>3</sub> 10 nm. Three different specimens with an identical structure were investigated. The Seebeck coefficients of GRP/Sb<sub>2</sub>Te<sub>3</sub> 10 nm [1] were measured using the Fraunhofer IPM device. The Seebeck coefficients of GRP/Sb<sub>2</sub>Te<sub>3</sub> 10 nm [2] and GRP/Sb<sub>2</sub>Te<sub>3</sub> 10 nm [3] were measured using the in-house-built device. There was a linear relation between the thermoelectric voltage and temperature difference demonstrating reliability of the sample preparation and measurement techniques.



## The interdependence of thermoelectric parameters

The interdependence of  $\alpha$ ,  $\sigma$  and  $k$  is shown in *Eqs. (S2-S4)* (S1).

$$\alpha = \frac{8\pi^2 k_B^2}{3eh^2} m^* T \left( \frac{\pi}{3n} \right)^{2/3} \quad \text{Eq. (S2)}$$

$$\sigma = ne\mu \quad \text{Eq. (S3)}$$

$$k = k_e + k_l = L\sigma T + k_l \quad \text{Eq. (S4)}$$

where  $k_B$  is the Boltzmann constant,  $e$  is the charge of electron,  $h$  is the Planck's constant,  $m^*$  is the effective mass of carrier,  $n$  is the carrier concentration,  $\mu$  is the carrier mobility and  $L$  is the Lorenz factor for free electrons ( $2.4 \times 10^{-8} \text{ J}^2 \text{ K}^{-2} \text{ C}^{-2}$ ). The parameters  $m^*$ ,  $\mu$  and  $k_l$  depend weakly on the carrier concentration (S14). The inverse relationship of  $\alpha$  and  $\sigma$  with respect to  $n$  makes it difficult to increase the thermoelectric power factor significantly, and the increase in  $\sigma$  is also accompanied by the increase in  $k_e$  through the Wiedemann-Franz law ( $k_e = L\sigma T$ ) (S1).

### The contact between graphene and Sb<sub>2</sub>Te<sub>3</sub> layers

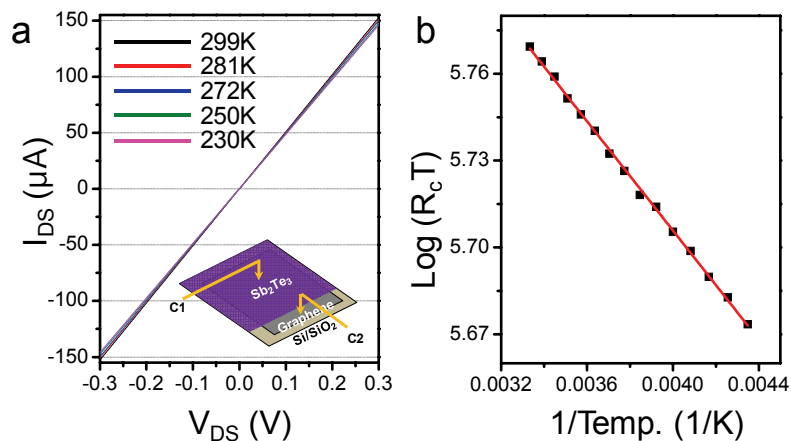

**Figure S7**| Electrical transport characteristics of GRP/Sb<sub>2</sub>Te<sub>3</sub> 10 nm (a) I-V characteristics (b) Arrhenius plot

The source-drain current-voltage characteristics were investigated as a function of the temperature (230~299 K). One probe was placed on top of the Sb<sub>2</sub>Te<sub>3</sub> layer, and the other probe contacted graphene. The electrode was constructed by soldering indium paste on each layer. The specific contact resistance ( $R_c$ ) can be described as (S15):

$$\log(R_c T) = \log\left(\frac{\kappa_B}{e A^*}\right) + \frac{e \phi_{bn}}{\kappa_B T} \quad \text{Eq. (S5)}$$

where  $A^*$  is the Richardson constant and  $\phi_{bn}$  is the schottky barrier height. There is a linear relationship between  $\log(R_c T)$  and  $1/T$  with a slope of  $e \phi_{bn} / \kappa_B$ . The contact was nearly ohmic with a barrier height of 8.6 meV determined by fitting the data (Fig. S7b).

## Finite element analysis

A simple 2-dimensional finite element modeling was carried out using COMSOL 3.5a to demonstrate that the graphene layer can work as a high conductivity channel for carriers. The modeling was carried out using a continuum approach, and the interfacial resistance between the graphene and  $\text{Sb}_2\text{Te}_3$  layers was not considered for simplicity. The thicknesses of graphene and  $\text{Sb}_2\text{Te}_3$  were 0.335 and 10 nm, respectively. The conductivity of graphene and  $\text{Sb}_2\text{Te}_3$  were  $2.32 \times 10^4$  and  $4.39 \times 10^2$  S/cm. It takes a lot of computational effort to construct and calculate meshes for a very high aspect ratio structure. Therefore, the length of the  $\text{Sb}_2\text{Te}_3$  structure was shortened to 80 nm as an approximation. Unstructured meshes were used in order to produce stable and accurate results for a specified degree of freedom. The number of computational mesh points was sufficiently large, and a further increase in mesh points did not affect the calculation results. Small squares on top of the  $\text{Sb}_2\text{Te}_3$  layer represent contact probes, and an insulating boundary condition was used for other outer walls. The electrical potentials of the left and right probes were set at 1 and 0 V, respectively. The current between two probes was calculated by solving the equation of continuity based on Ohm's law to obtain the conductance of each configuration. Figure S8a and b show constructed meshes for  $\text{Sb}_2\text{Te}_3$  10 nm and GRP/ $\text{Sb}_2\text{Te}_3$  10 nm.

Figure S8c shows the simulation result of  $\text{Sb}_2\text{Te}_3$  10 nm (without graphene). The streamlines, perpendicular to the potential gradient, represent passages of carriers. They were uniformly distributed throughout the thickness. Figure S8d shows the result of GRP/ $\text{Sb}_2\text{Te}_3$  10 nm. Many carriers firstly moved to graphene, probably due to the significantly higher conductivity of graphene, and returned to the probe positioned at the upper right corner. The conductance ratio of  $\text{Sb}_2\text{Te}_3$  10 nm: GRP/ $\text{Sb}_2\text{Te}_3$  10 nm was 1:1.63. Although this simple 2-dimensional continuum model does not reflect all the complicated physics of nanoscale bilayer films, it clearly demonstrates that the graphene layer can work as a high conductivity channel for carriers.

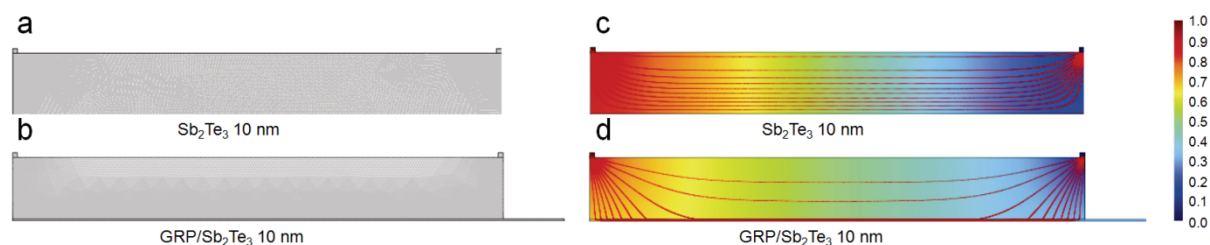

**Figure S8** Finite element analysis (COMSOL 3.5a) was carried out to simulate electrical transports in  $\text{Sb}_2\text{Te}_3$  10 nm and GRP/ $\text{Sb}_2\text{Te}_3$  10 nm. (a, b) Computational meshes. (c, d) Simulation results. The electrical potential is denoted by surface color, and streamlines are perpendicular to the potential gradient.

### Jonker relationship ( $\alpha$ - $\ln\sigma$ ) analysis

The linear inverse relationship between  $\alpha$  and  $\ln\sigma$  can be derived by a simple theoretical model based on Boltzmann statistics with the precondition that the density-of-state (DOS)- $\mu$  product remains relatively constant (S14, S16-17). For p-type semiconductors,

$$\alpha = m(b - \ln \sigma) \quad \text{Eq. (S6)}$$

$$m = k_B/e = 86.14 \mu\text{V} / \text{K} ; b = A + \ln N_v \mu e \quad \text{Eq. (S7)}$$

where  $N_v$  is the valence band DOS  $\left( N_v = \left( \frac{2\pi m_h^* k_B T}{h^2} \right)^{3/2} \right)$  and  $A$  is the transport constant (S14).

The chi-square linear regression analysis was carried out for the representative data sets of co-evaporated  $\text{Sb}_2\text{Te}_3$  thin films in literatures (S18-19). A close examination revealed that the linear inverse relation was more evident when the films were synthesized at a fixed substrate temperature with varying composition ratios although there was somewhat deviation from the theoretical slope of  $k_B/e = 86.14 \mu\text{V}/\text{K}$  (Fig. S9a) (S18). The linear relation could not be observed when films were prepared at different substrate temperatures with little variation in Te concentration (Fig. S9b) (S19). The deviation from the theoretical Jonker relationship was also reported previously (S14, S20).

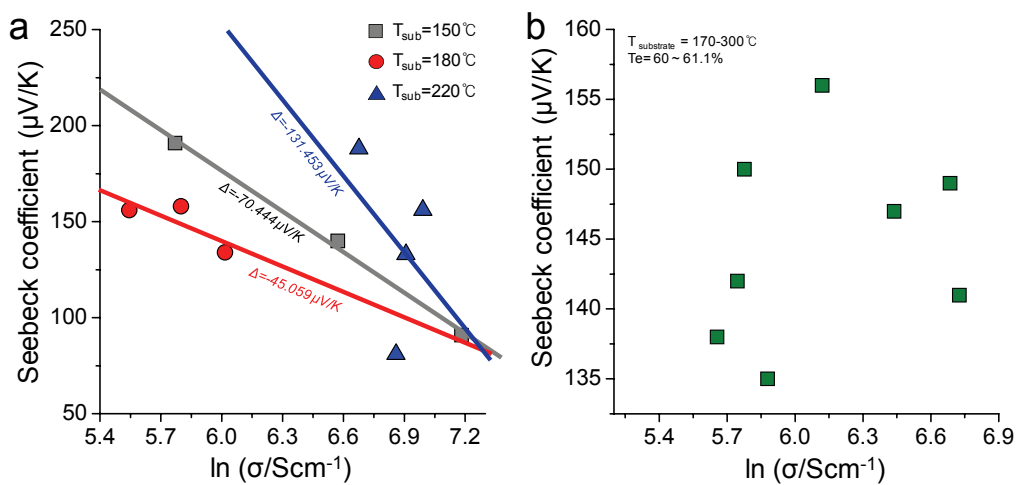

**Figure S9** Co-evaporated  $\text{Sb}_2\text{Te}_3$  thin films (a) The films were synthesized at a fixed substrate temperature with varying composition ratios (S18) (b) The films were prepared at different substrate temperatures with little variation in Te concentration (S19).

## Thermoelectric figure of merit

The thermoelectric figure of merit was estimated as a function of  $k_l$  using *Eq. (3)* (Fig.S10). The data of GRP/Sb<sub>2</sub>Te<sub>3</sub> 10nm were used for the calculation ( $\alpha=324 \mu\text{V/K}$ ,  $\sigma=8.20 \times 10^4 \text{ S/m}$ ,  $k_e = L\sigma T=0.59 \text{ W/m-K}$ ,  $T=300 \text{ K}$ ).

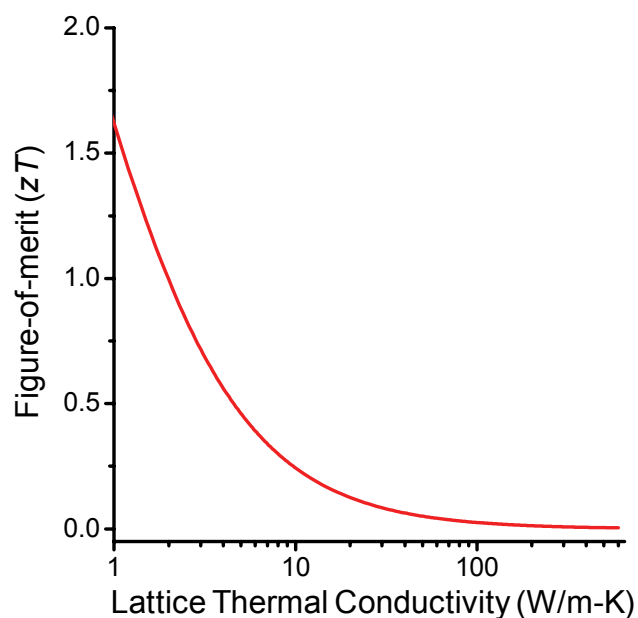

**Figure S10**| Thermoelectric figure of merit as a function of the lattice thermal conductivity

## References

- S1.** G. J. Snyder; E. S. Toberer, *Nat. Mater.*, 2008, **7**, 105
- S2.** D. M. Rowe, *Thermoelectrics Handbook: macro to nano*, CRC: Boca Raton, FL, 2006
- S3.** S. J. Jeon; M. Oh; H. Jeon; S. D. Kang; H. K. Lyee; S. Hyun; H. J. Lee, *J. Electrochem. Soc.*, 2011, **158**, H808-813
- S4.** J. H. Seol; I. Jo; A. L. Moore; L. Lindsay; Z. H. Aitken; M. T. Pettes; X. Li; Z. Yao; R. Huang; D. Broido; N. Mingo; R. S. Ruoff; L. Shi, *Science*, 2010, **328**, 213
- S5.** A. Jacquot; J. König; H. Böttner, *25<sup>th</sup> Int'l Conference on Thermoelectrics*, Vienna, 2006, **184**
- S6.** V. Mattevi; H. Kim; M. Chhowalla, *J. Mater. Chem.*, 2011, **21**, 3324
- S7.** A. A. Balandin, *Nat. Mater.*, 2011, **10**, 569
- S8.** H. Zou; D. M. Rowe; G. Min, *J. Vac. Sci. Technol. A*, 2001, **19**, 899
- S9.** G. H. Han; F. Güneş; J. J. Bae; E. S. Kim; S. J. Chae; H. J. Shin; J. Y. Choi; D. Pribat; Y. H. Lee, *Nano Lett.*, 2011, **11**, 4144
- S10.** R. R. Nair; P. Blake; A. N. Grigorenko; K. S. Novoselov; T. J. Booth; T. Stauber; N. M. R. Peres; A. K. Geim, *Science*, 2008, **320**, 1308
- S11.** X. Li; Y. Zhu; W. Cai; M. Borysiak; B. Han; D. Chen; R. D. Piner; L. Colombo; R. S. Ruoff, *Nano lett.*, 2009, **9**, 4359
- S12.** D. H. Kim; E. Byon; G. H. Lee; S. Cho, *Thin Solid Films*, 2006, **510**, 148
- S13.** Z. Zhang; Y. Wang; Y. Deng; Y. Xu, *Solid State Comm.*, 2011, **151**, 1520
- S14.** D. M. Rowe; G. Min, *J. Mater. Lett.*, 1995, **14**, 617
- S15.** S. M. Sze, *Physics of Semiconductor Devices*, 2nd ed.; Wiley: New York, 1981
- S16.** Q. Zhu; E. Mitchell Hopper; B. J. Ingram; T. O. Mason, *J. Am. Ceram. Soc.*, 2011, **94**, 187
- S17.** G. Jonker, *Philips Res. Rep.*, 1968, **23**, 131-8
- S18.** L. M. Goncalves; P. Alpuim; A. G. Rolo; J. H. Correia, *Thin Solid Films*, 2011, **519**, 4152
- S19.** L. W. da Silva; M. Kaviani; C. Uher, *J. Appl. Phys.*, 2005, **97**, 114903
- S20.** H. Ohta; S. Kim; Y. Mune; T. Mizoquchi; K. Nomura; S. Ohta; T. Nomura; Y. Nakanishi; Y. Ikuhara; M. Hirano; H. Hosono; K. Koumoto, *Nat. Mater.*, 2007, **6**, 129
